# Supplementary material for: Evolutionary trade‐offs of insecticide resistance — The fitness costs associated with target‐site mutations in the nAChR of Drosophila melanogaster
Source: PubMed Central journal article supplement (PMC7496652; doi:10.1111/mec.15503), 2020-06-22

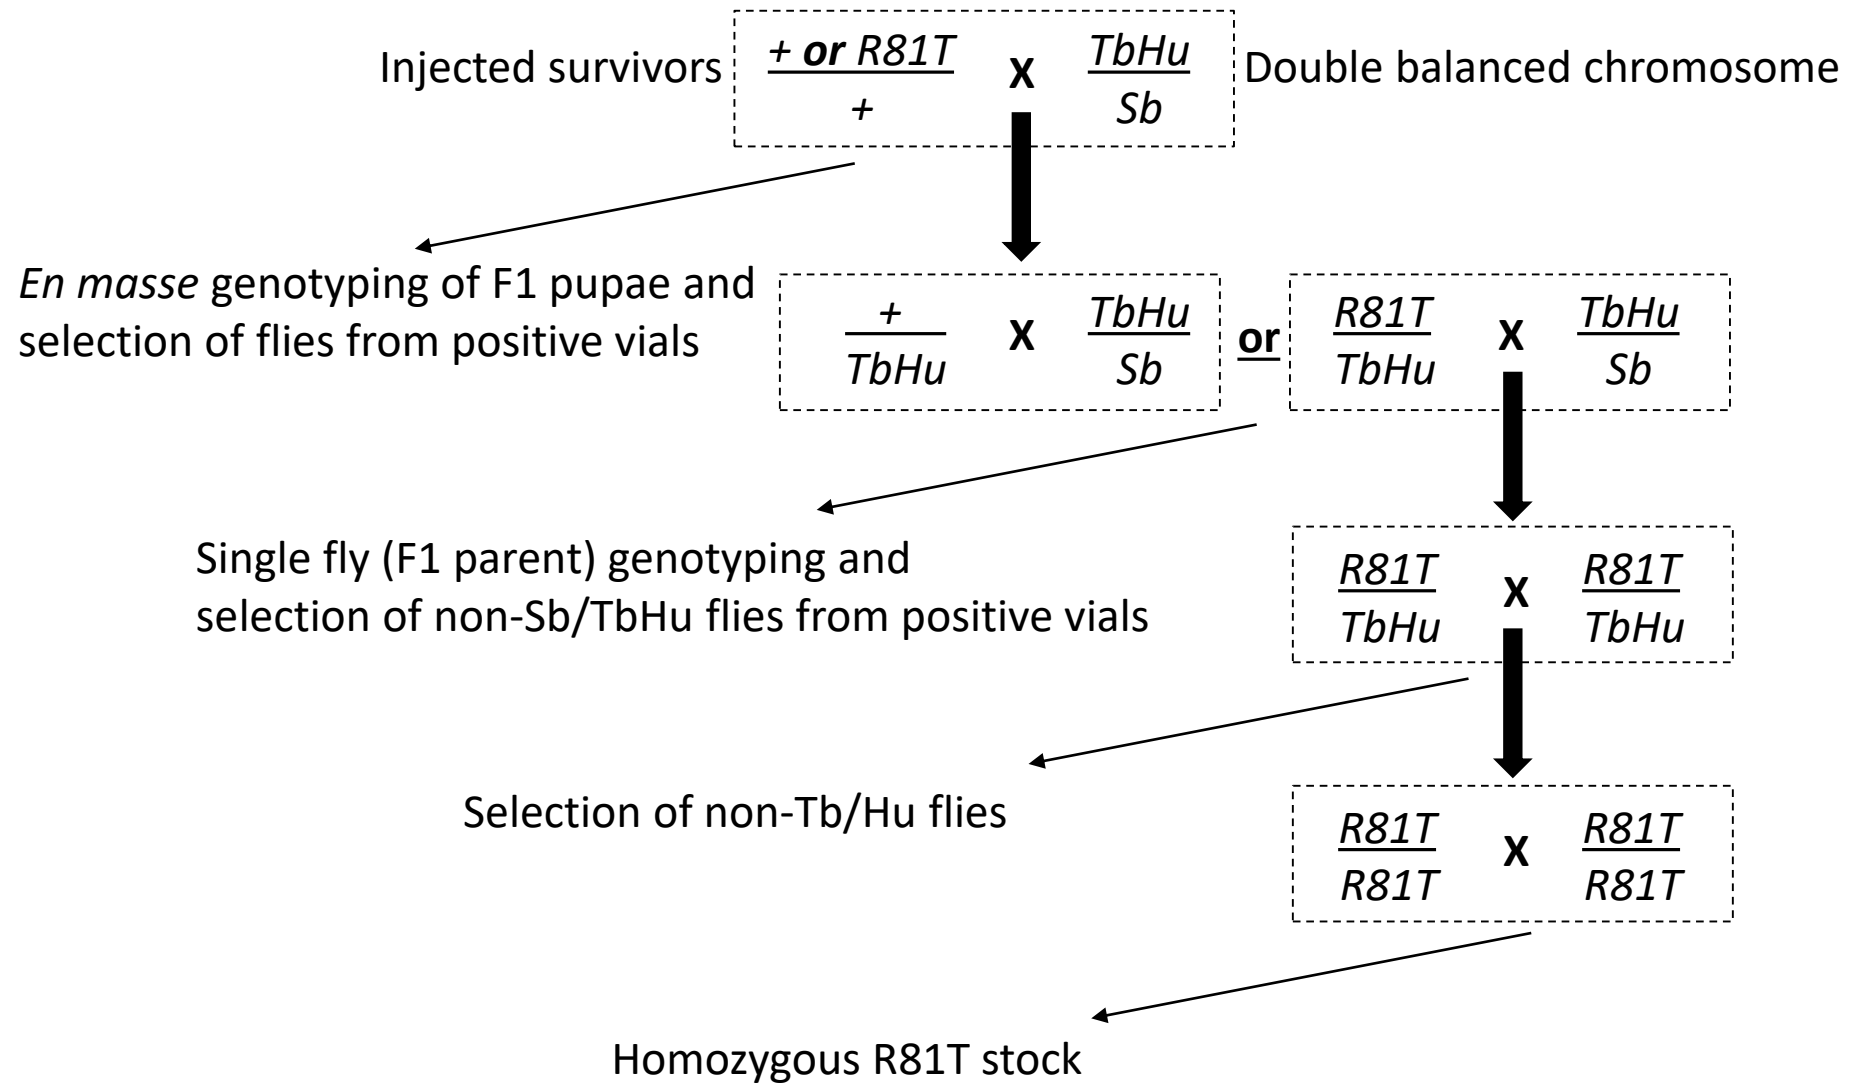

Supplement: MEC-29-2661-s001.pdf [file MEC-29-2661-s001.pdf]
